# Supplementary material for: The Amino-Terminus of Nitric Oxide Sensitive Guanylyl Cyclase α1 Does Not Affect Dimerization but Influences Subcellular Localization
Source: PubMed Central journal article supplement (PMC3184163; doi:10.1371/journal.pone.0025772), 2011-09-30
Supplement: pone.0025772.s001.pdf [file pone.0025772.s001.pdf]

# S1

|            |       |                                                      |
|------------|-------|------------------------------------------------------|
| α1 (human) | (1)   | MFCTKLDKDLKITGECPFSLAPGQVPNESSEEAAGSSESCKATVPICQDI   |
| α1 (rat)   | (1)   | MFCRKFKDLKITGECPFSLAPGQVPTEPIEEVAGVSESCQATLPTCQEF    |
| α1 (human) | (51)  | PEKNIQESLPQRKTSRSRVYLHTLAESICKLIFPEFERLNVALQRTLAKH   |
| α1 (rat)   | (51)  | AEN-AEGSHPQRKTSRNRVYLHTLAESIGKLIFPEFERLNVALQRTLAKH   |
| α1 (human) | (101) | KIKESRKSLEERDFEKTIAEQAVAAGVPVEVIKESLGEEVFKICYEEDEN   |
| α1 (rat)   | (100) | KIKENRNSSEKEDLERIAAEEAIAAGVPVEALKDSLGEELFKICYEEDEN   |
| α1 (human) | (151) | ILGVVGGTLKDFLNSFSTLLKQSSHCQEAERGRLEDASILCLDKEDDFL    |
| α1 (rat)   | (150) | ILGVVGGTLKDFLNSFSTLLKQSSHCQEAERGRLEDASILCLDKDQDFL    |
| α1 (human) | (201) | HVYFFPKRTTSLILPGIIKAAAHVLYETEVEVSLMPPCFHNDCEFVNQ     |
| α1 (rat)   | (200) | NVYFFPKRTTALLLPGIIKAAARILYESHVEVSLMPPCFRSECTEFVNQ    |
| α1 (human) | (251) | PYLLYSVHMKSTKPSLSPSKPQSSLVIPITSLFCKTFPFHFMFDKDMTILQ  |
| α1 (rat)   | (250) | PYLLYSVHVKSTKPSLSPGKPQSSLVIPITSLFCKTFPFHMLDRDLAILQ   |
| α1 (human) | (301) | FGNGIRRLMNRDRFQGKPNFEEYFEILTPKINQTFSGIMTMLNMQFVVRV   |
| α1 (rat)   | (300) | LGNGIRRLVNKRDRFQGKPNFEEFFEILTPKINQTFSGIMTMLNMQFVIRV  |
| α1 (human) | (351) | RRWDNSVKKSSRVMDLKGQMIYIVESSAILFLGSPCVDRLDFTGRGLYL    |
| α1 (rat)   | (350) | RRWDNLVKKSSRVMDLKGQMIYIVESSAILFLGSPCVDRLDFTGRGLYL    |
| α1 (human) | (401) | SDIPIHNALRDVVLIGEQAARAQDGLKKRLGKLGKATLEQAHQALEEEKKKT |
| α1 (rat)   | (400) | SDIPIHNALRDVVLIGEQAARAQDGLKKRLGKLGKATLEHAHQALEEEKKKT |
| α1 (human) | (451) | VDLLCSIFPCEVAQQLWQGVVQAKKFSNVTMLFSDIVGFTAICSQCSPL    |
| α1 (rat)   | (450) | VDLLCSIFPSEVAQQLWQGVVQAKKFNEVTMLFSDIVGFTAICSQCSPL    |
| α1 (human) | (501) | QVITMLNALYTRFDQQCGELDVYKVETIGDAYCVAGGLHRESATHAVQIA   |
| α1 (rat)   | (500) | QVITMLNALYTRFDQQCGELDVYKVETIGDAYCVAGGLHRESATHAVQIA   |
| α1 (human) | (551) | LMALKMMELSDVMSPHGEPKMRIGLHSGSVFAGVGVKMPRYCLFGNN      |
| α1 (rat)   | (550) | LMALKMMELSDVMSPHGEPKMRIGLHSGSVFAGVGVKMPRYCLFGNN      |
| α1 (human) | (601) | VTLANKFESCSVPRKINVSPTTYRLLKDCPGFVFTPRSREELPPNFPSEI   |
| α1 (rat)   | (600) | VTLANKFESCSVPRKINVSPTTYRLLKDCPGFVFTPRSREELPPNFPSEI   |
| α1 (human) | (651) | PGICHFLDAYQQ-GTNSKPCFQKKDVEDGNANFLGKASGID            |
| α1 (rat)   | (650) | PGICHFLDAYQHQPNSKPFQKDAEDGNANFLGKASGVD               |
