# Supplementary material for: The Amino-Terminus of Nitric Oxide Sensitive Guanylyl Cyclase α1 Does Not Affect Dimerization but Influences Subcellular Localization
Source: PubMed Central journal article supplement (PMC3184163; doi:10.1371/journal.pone.0025772), 2011-09-30
Supplement: pone.0025772.s002.pdf [file pone.0025772.s002.pdf]

## S2

## ATG\_1

$\alpha 1$ -WT (496) TCGCAGCAGGGTAAGAGACACCAACACC**ATG**TTTCTGCACGAAGCTCAAGG  
 C\* $\alpha 1$  (276) TCGCAGCAGGGTAAGAGACACCAACACCATGTTCTGCACGAAGCTCAAGG  
 C- $\alpha 1$  (167) -----

$\alpha 1$ -WT (546) ATCTCAAGATCACAGGAGAGTGTCTTTCTCCTTACTGGCACCAGGTCAA  
 C\* $\alpha 1$  (326) ATCTCAAGATCACAGGAGAGTGTCTTTCTCCTTACTGGCACCAGGTCAA  
 C- $\alpha 1$  (167) -----GTCAA

$\alpha 1$ -WT (596) GTTCCTAACGAGTCTTCAGAGGAGGCAGCAGGAAGCTCAGAGAGCTGCCAA  
 C\* $\alpha 1$  (376) GTTCCTAACGAGTCTTCAGAGGAGGCAGCAGGAAGCTCAGAGAGCTGCCAA  
 C- $\alpha 1$  (172) GTTCCTAACGAGTCTTCAGAGGAGGCAGCAGGAAGCTCAGAGAGCTGCCAA

$\alpha 1$ -WT (646) AGCAACCGTGCCCATCTGTCAAGACATTCCTGAGAAGAACATACAAGAAA  
 C\* $\alpha 1$  (426) AGCAACCGTGCCCATCTGTCAAGACATTCCTGAGAAGAACATACAAGAAA  
 C- $\alpha 1$  (222) AGCAACCGTGCCCATCTGTCAAGACATTCCTGAGAAGAACATACAAGAAA

$\alpha 1$ -WT (696) GTCTTCCTCAAAGAAAAACCAGTCGGAGCCGAGTCTATCTTCACACTTTG  
 C\* $\alpha 1$  (476) GTCTTCCTCAAAGAAAAACCAGTCGGAGCCGAGTCTATCTTCACACTTTG  
 C- $\alpha 1$  (272) GTCTTCCTCAAAGAAAAACCAGTCGGAGCCGAGTCTATCTTCACACTTTG

$\alpha 1$ -WT (746) GCAGAGAGTATTTGCAAACCTGATTTTCCCAGAGTTTGAACGGCTGAATGT  
 C\* $\alpha 1$  (526) GCAGAGAGTATTTGCAAACCTGATTTTCCCAGAGTTTGAACGGCTGAATGT  
 C- $\alpha 1$  (322) GCAGAGAGTATTTGCAAACCTGATTTTCCCAGAGTTTGAACGGCTGAATGT

$\alpha 1$ -WT (796) TGCACTTCAGAGAACATTGGCAAAGCACAAAATAAAAGAAAGCAGGAAAT  
 C\* $\alpha 1$  (576) TGCACTTCAGAGAACATTGGCAAAGCACAAAATAAAAGAAAGCAGGAAAT  
 C- $\alpha 1$  (372) TGCACTTCAGAGAACATTGGCAAAGCACAAAATAAAAGAAAGCAGGAAAT

$\alpha 1$ -WT (846) CTTTGGAAAGAGAAGACTTTGAAAAACAATTGCAGAGCAAGCAGTTGCA  
 C\* $\alpha 1$  (626) CTTTGGAAAGAGAAGACTTTGAAAAACAATTGCAGAGCAAGCAGTTGCA  
 C- $\alpha 1$  (422) CTTTGGAAAGAGAAGACTTTGAAAAACAATTGCAGAGCAAGCAGTTGCA

$\alpha 1$ -WT (896) GCAGGAGTTCAGTGGAGGTTATCAAAGAATCTCTTGGTGAAGAGGTTTT  
 C\* $\alpha 1$  (676) GCAG-----  
 C- $\alpha 1$  (472) GCAGGAGTTCAGTGGAGGTTATCAAAGAATCTCTTGGTGAAGAGGTTTT

$\alpha 1$ -WT (946) TAAAATATGTTACGAGGAAGATGAAAACATCCTTGGGGTGGTTGGAGGCA  
 C\* $\alpha 1$  (680) -----  
 C- $\alpha 1$  (522) TAAAATATGTTACGAGGAAGATGAAAACATCCTTGGGGTGGTTGGAGGCA

$\alpha 1$ -WT (996) CCCTTAAAGATTTTTTAAACAGCTTCAGTACCCTTCTGAAACAGAGCAGC  
 C\* $\alpha 1$  (680) -----AG--CAGC  
 C- $\alpha 1$  (572) CCCTTAAAGATTTTTTAAACAGCTTCAGTACCCTTCTGAAACAGAGCAGC

$\alpha 1$ -WT (1046) CATTGCCAAGAAGCAGGAAAAAGGGGCAGGCTTGAGGACGCCTCCATTCT  
 C\* $\alpha 1$  (686) CATTGCCAAGAAGCAGGAAAAAGGGGCAGGCTTGAGGACGCCTCCATTCT  
 C- $\alpha 1$  (622) CATTGCCAAGAAGCAGGAAAAAGGGGCAGGCTTGAGGACGCCTCCATTCT

$\alpha 1$ -WT (1096) ATGCCTGGATAAGGAGGATGATTTTCTACATGTTTACTACTTCTTCCCTA  
 C\* $\alpha 1$  (736) ATGCCTGGATAAGGAGGATGATTTTCTACATGTTTACTACTTCTTCCCTA  
 C- $\alpha 1$  (672) ATGCCTGGATAAGGAGGATGATTTTCTACATGTTTACTACTTCTTCCCTA

$\alpha 1$ -WT (1146) AGAGAACCACCTCCCTGATTCTTCCCAGCATCATAAAGCAGCTGCTCAC  
 C\* $\alpha 1$  (786) AGAGAACCACCTCCCTGATTCTTCCCAGCATCATAAAGCAGCTGCTCAC  
 C- $\alpha 1$  (722) AGAGAACCACCTCCCTGATTCTTCCCAGCATCATAAAGCAGCTGCTCAC

$\alpha 1$ -WT (1196) GTATTATATGAAACGGAAGTGGAAGTGTGTTAATGCCTCCCTGCTTCCA  
 C\* $\alpha 1$  (836) GTATTATATGAAACGGAAGTGGAAGTGTGTTAATGCCTCCCTGCTTCCA  
 C- $\alpha 1$  (772) GTATTATATGAAACGGAAGTGGAAGTGTGTTAATGCCTCCCTGCTTCCA

**ATG\_236**

$\alpha 1$ -WT (1246) TAATGATTGCAGCGAGTTTGTGAATCAGCCCTACTTGTGTACTCCGTTT  
 C\* $\alpha 1$  (886) TAATGATTGCAGCGAGTTTGTGAATCAGCCCTACTTGTGTACTCCGTTT  
 C- $\alpha 1$  (822) TAATGATTGCAGCGAGTTTGTGAATCAGCCCTACTTGTGTACTCCGTTT

$\alpha 1$ -WT (1296) ACATGAAAAGCACCAGCCATCCCTGTCCCCAGCAAACCCAGTCCTCG  
 C\* $\alpha 1$  (936) AC**ATG**AAAAGCACCAGCCATCCCTGTCCCCAGCAAACCCAGTCCTCG  
 C- $\alpha 1$  (872) AC**ATG**AAAAGCACCAGCCATCCCTGTCCCCAGCAAACCCAGTCCTCG

**ATG\_259**
